# Supplementary material
Source: PubMed Central journal article supplement (PMC10101580)
Supplement: kidney360-4-054-s001.pdf [file kidney360-4-054-s001.pdf]

## Supplemental Table of Contents

Supplemental Table 1A. HD patient characteristics, by gout indications

Supplemental Table 1B. PD patient characteristics, by gout indications

Supplemental Table 2. Patient characteristics in HD and PD patients, with and without gout, after propensity score matching.

**Supplemental Figure 1.** Association between 5-category gout exposure and all-cause mortality in HD (A) and PD (B).

Supplemental Table 1A. HD patient characteristics, by gout indications

|                                    | HD                    |                      |                        |                                 |               |
|------------------------------------|-----------------------|----------------------|------------------------|---------------------------------|---------------|
|                                    | colchicine Rx<br>1145 | febuxostat Rx<br>517 | allopurinol Rx<br>6380 | prior gout<br>diagnosis<br>1367 | none<br>60888 |
| <b>Demographics</b>                |                       |                      |                        |                                 |               |
| Patient age, years                 | 67.0(13.1)            | 68.8(13.1)           | 70.0(12.4)             | 66.7(13.7)                      | 63.2(14.9)    |
| Male, %                            | 67%                   | 62%                  | 64%                    | 63%                             | 55%           |
| Black race, %                      | 43%                   | 26%                  | 32%                    | 45%                             | 39%           |
| Body mass index, kg/m <sup>2</sup> | 30.3(7.3)             | 29.7(7.2)            | 30.3(7.3)              | 29.0(7.1)                       | 28.3(7.1)     |
| Time on dialysis, years            | 2.25(2.96)            | 1.49(2.05)           | 1.98(2.58)             | 3.88(4.14)                      | 3.35(4.04)    |
| <b>Comorbidity history</b>         |                       |                      |                        |                                 |               |
| Coronary artery disease            | 28%                   | 25%                  | 25%                    | 34%                             | 19%           |
| Cancer (non-skin)                  | 8%                    | 7%                   | 8%                     | 11%                             | 5%            |
| Other cardiovascular disease       | 24%                   | 26%                  | 26%                    | 30%                             | 16%           |
| Cerebrovascular disease            | 7%                    | 6%                   | 7%                     | 10%                             | 6%            |
| Congestive heart failure           | 32%                   | 31%                  | 32%                    | 34%                             | 24%           |
| Diabetes                           | 61%                   | 61%                  | 65%                    | 64%                             | 66%           |
| Gastrointestinal bleeding          | 3%                    | 4%                   | 4%                     | 9%                              | 4%            |
| Hypertension                       | 83%                   | 83%                  | 82%                    | 93%                             | 79%           |
| Lung disease                       | 11%                   | 10%                  | 11%                    | 13%                             | 7%            |
| Neurologic disease                 | 5%                    | 5%                   | 5%                     | 11%                             | 5%            |
| Psychiatric disorder               | 21%                   | 25%                  | 25%                    | 30%                             | 24%           |
| Peripheral vascular disease        | 13%                   | 13%                  | 13%                    | 19%                             | 12%           |
| Recurrent cellulitis/gangrene      | 5%                    | 3%                   | 4%                     | 9%                              | 5%            |

| Dialysis treatments                                              |              |              |              |               |              |
|------------------------------------------------------------------|--------------|--------------|--------------|---------------|--------------|
| Vascular access type                                             |              |              |              |               |              |
| Catheter                                                         | 33%          | 40%          | 39%          | 32%           | 41%          |
| Fistula                                                          | 54%          | 46%          | 50%          | 54%           | 47%          |
| Graft                                                            | 12%          | 13%          | 11%          | 13%           | 13%          |
| Singlepool Kt/V                                                  | 1.53(0.28)   | 1.53(0.28)   | 1.52(0.29)   | 1.57(0.26)    | 1.54(0.28)   |
| Labs                                                             |              |              |              |               |              |
| Phosphorus, mg/dL                                                | 5.17(1.57)   | 5.20(1.58)   | 5.00(1.45)   | 5.17(1.54)    | 5.19(1.64)   |
| Albumin, g/dL                                                    | 3.67(0.47)   | 3.64(0.46)   | 3.64(0.45)   | 3.68(0.48)    | 3.63(0.49)   |
| Uric acid, mg/dL                                                 | 5.89(1.83)   | 4.70(1.71)   | 5.40(1.55)   | 6.21(1.32)    | 5.94(1.45)   |
| PTH, pg/mL                                                       | 330[202,538] | 295[168,456] | 301[180,476] | 363[225,628]  | 322[188,535] |
| Creatinine, mg/dL                                                | 7.43(2.90)   | 6.88(2.76)   | 6.85(2.80)   | 8.11(3.13)    | 7.57(3.07)   |
| Hemoglobin, g/dL                                                 | 10.6(1.4)    | 10.5(1.3)    | 10.6(1.4)    | 10.6(1.4)     | 10.5(1.4)    |
| Ferritin, ng/mL                                                  | 571[298,937] | 609[312,874] | 593[323,932] | 681[392,1004] | 615[338,948] |
| White blood cell count,<br>10 <sup>3</sup> cells/mm <sup>3</sup> | 6.7[5.2,8.3] | 6.9[5.4,8.4] | 6.9[5.5,8.5] | 6.5[5.1,8.1]  | 6.7[5.4,8.4] |

Mean (std dev), median [inter-quartile range], or % shown. Mutually exclusive categories were defined hierarchically as (1) colchicine Rx alone; (2) febuxostat Rx with no colchicine Rx; (3) allopurinol Rx with no colchicine or febuxostat Rx; (4) prior diagnosis of gout with no colchicine, febuxostat, or allopurinol Rx; and (5) none of the above.

Supplemental Table 1B. PD patient characteristics, by gout indications

|                                    | PD                   |                     |                       |                                |              |
|------------------------------------|----------------------|---------------------|-----------------------|--------------------------------|--------------|
|                                    | colchicine Rx<br>142 | febuxostat Rx<br>73 | allopurinol Rx<br>601 | prior gout<br>diagnosis<br>244 | none<br>4057 |
| <b>Demographics</b>                |                      |                     |                       |                                |              |
| Patient age, years                 | 61.6(13.6)           | 63.2(13.1)          | 62.8(13.7)            | 62.4(13.9)                     | 56.2(15.3)   |
| Male, %                            | 62%                  | 75%                 | 72%                   | 63%                            | 53%          |
| Black race, %                      | 31%                  | 16%                 | 25%                   | 25%                            | 27%          |
| Body mass index, kg/m <sup>2</sup> | 30.9(6.5)            | 30.8(7.2)           | 30.3(6.0)             | 29.9(6.1)                      | 29.0(6.5)    |
| Time on dialysis, years            | 2.06(2.72)           | 1.32(1.62)          | 2.14(2.95)            | 2.71(2.79)                     | 2.63(3.39)   |
| <b>Comorbidity history</b>         |                      |                     |                       |                                |              |
| Coronary artery disease            | 21%                  | 37%                 | 22%                   | 31%                            | 18%          |
| Cancer (non-skin)                  | 9%                   | 9%                  | 9%                    | 13%                            | 5%           |
| Other cardiovascular disease       | 11%                  | 27%                 | 14%                   | 17%                            | 10%          |
| Cerebrovascular disease            | 5%                   | 7%                  | 5%                    | 9%                             | 4%           |
| Congestive heart failure           | 14%                  | 26%                 | 13%                   | 22%                            | 12%          |
| Diabetes                           | 47%                  | 49%                 | 50%                   | 44%                            | 52%          |
| Gastrointestinal bleeding          | 0%                   | 1%                  | 3%                    | 5%                             | 1%           |
| Hypertension                       | 78%                  | 85%                 | 76%                   | 85%                            | 75%          |
| Lung disease                       | 6%                   | 11%                 | 4%                    | 10%                            | 4%           |
| Neurologic disease                 | 1%                   | 4%                  | 2%                    | 4%                             | 2%           |
| Psychiatric disorder               | 14%                  | 16%                 | 18%                   | 25%                            | 19%          |
| Peripheral vascular disease        | 11%                  | 16%                 | 8%                    | 11%                            | 9%           |
| Recurrent cellulitis/gangrene      | 1%                   | 2%                  | 2%                    | 4%                             | 2%           |
| <b>Labs</b>                        |                      |                     |                       |                                |              |
| Phosphorus, mg/dL                  | 5.06(1.51)           | 5.06(1.23)          | 5.02(1.40)            | 5.25(1.55)                     | 5.31(1.56)   |
| Albumin, g/dL                      | 3.55(0.44)           | 3.53(0.41)          | 3.55(0.44)            | 3.53(0.41)                     | 3.51(0.47)   |
| Uric acid, mg/dL                   | 6.26(1.56)           | 5.46(1.71)          | 5.99(2.16)            | 6.60(1.85)                     | 6.66(1.62)   |
| PTH, pg/mL                         | 352[213,542]         | 309[203,460]        | 344[202,516]          | 367[221,545]                   | 358[210,556] |
| Creatinine, mg/dL                  | 8.53(3.64)           | 6.93(3.51)          | 8.53(4.13)            | 9.42(4.42)                     | 9.04(4.30)   |

|                                                                  |              |              |              |              |              |
|------------------------------------------------------------------|--------------|--------------|--------------|--------------|--------------|
| Hemoglobin, g/dL                                                 | 11.0(1.5)    | 11.5(1.5)    | 11.2(1.6)    | 11.0(1.4)    | 11.0(1.5)    |
| Ferritin, ng/mL                                                  | 491[256,880] | 539[260,902] | 514[260,921] | 660[352,996] | 582[300,933] |
| White blood cell count,<br>10 <sup>3</sup> cells/mm <sup>3</sup> | 6.9[5.7,9.0] | 7.7[5.6,9.2] | 7.3[5.7,9.2] | 7.5[5.9,9.3] | 7.2[5.7,9.2] |

Mean (std dev), median [inter-quartile range], or % shown. Mutually exclusive categories were defined hierarchically as (1) colchicine Rx alone; (2) febuxostat Rx with no colchicine Rx; (3) allopurinol Rx with no colchicine or febuxostat Rx; (4) prior diagnosis of gout with no colchicine, febuxostat, or allopurinol Rx; and (5) none of the above.

Supplemental Table 2. Patient characteristics in HD and PD patients, with and without gout, after propensity score matching.

|                                                                  | HD              |              | PD              |              |
|------------------------------------------------------------------|-----------------|--------------|-----------------|--------------|
|                                                                  | No gout<br>9409 | Gout<br>9409 | No gout<br>1060 | Gout<br>1060 |
| <b>Demographics</b>                                              |                 |              |                 |              |
| Patient age, years                                               | 69.2(12.9)      | 69.1(12.8)   | 62.7(13.8)      | 62.6(13.7)   |
| Male, %                                                          | 64%             | 64%          | 69%             | 69%          |
| Black race, %                                                    | 34%             | 35%          | 24%             | 25%          |
| Body mass index, kg/m <sup>2</sup>                               | 30.0(7.6)       | 30.0(7.3)    | 30.3(6.6)       | 30.3(6.2)    |
| Time on dialysis, years                                          | 2.34(2.84)      | 2.27(2.97)   | 2.20(2.54)      | 2.20(2.83)   |
| <b>Comorbidity history</b>                                       |                 |              |                 |              |
| Coronary artery disease                                          | 27%             | 26%          | 24%             | 25%          |
| Cancer (non-skin)                                                | 9%              | 9%           | 10%             | 10%          |
| Other cardiovascular disease                                     | 26%             | 26%          | 14%             | 15%          |
| Cerebrovascular disease                                          | 7%              | 7%           | 7%              | 6%           |
| Congestive heart failure                                         | 32%             | 32%          | 14%             | 16%          |
| Diabetes                                                         | 64%             | 64%          | 47%             | 48%          |
| Gastrointestinal bleeding                                        | 4%              | 4%           | 3%              | 3%           |
| Hypertension                                                     | 83%             | 83%          | 79%             | 79%          |
| Lung disease                                                     | 11%             | 11%          | 7%              | 6%           |
| Neurologic disease                                               | 6%              | 6%           | 3%              | 3%           |
| Psychiatric disorder                                             | 25%             | 25%          | 18%             | 19%          |
| Peripheral vascular disease                                      | 14%             | 14%          | 10%             | 10%          |
| Recurrent<br>cellulitis/gangrene                                 | 5%              | 5%           | 2%              | 2%           |
| <b>Dialysis treatments</b>                                       |                 |              |                 |              |
| <b>Vascular access type</b>                                      |                 |              |                 |              |
| Catheter                                                         | 38%             | 37%          |                 |              |
| Fistula                                                          | 51%             | 51%          |                 |              |
| Graft                                                            | 12%             | 12%          |                 |              |
| Singlepool Kt/V                                                  | 1.52(0.27)      | 1.53(0.28)   |                 |              |
| <b>Labs</b>                                                      |                 |              |                 |              |
| Phosphorus, mg/dL                                                | 5.04(1.55)      | 5.06(1.49)   | 5.08(1.41)      | 5.08(1.44)   |
| Albumin, g/dL                                                    | 3.65(0.46)      | 3.65(0.46)   | 3.53(0.45)      | 3.54(0.43)   |
| Uric acid, mg/dL                                                 | 5.84(1.37)      | 5.53(1.63)   | 6.72(1.77)      | 6.14(1.95)   |
| PTH, pg/mL                                                       | 297[180,481]    | 312[187,500] | 335[193,521]    | 346[206,520] |
| Creatinine, mg/dL                                                | 7.08(2.86)      | 7.11(2.90)   | 8.70(4.11)      | 8.62(4.14)   |
| Hemoglobin, g/dL                                                 | 10.6(1.3)       | 10.6(1.4)    | 11.1(1.6)       | 11.1(1.5)    |
| Ferritin, ng/mL                                                  | 583[319,916]    | 603[328,941] | 578[302,930]    | 549[271,939] |
| White blood cell count,<br>10 <sup>3</sup> cells/mm <sup>3</sup> | 6.8[5.5,8.4]    | 6.8[5.4,8.5] | 7.2[5.8,9.2]    | 7.3[5.7,9.3] |

Gout: active Rx for colchicine or feboxustat or allopurinol; or prior diagnosis of gout (Gout3);  
Mean (std dev), median [inter-quartile range], or % shown.

**Supplemental Figure1.** Association between 5-category gout exposure and all-cause mortality in HD (A) and PD (B).

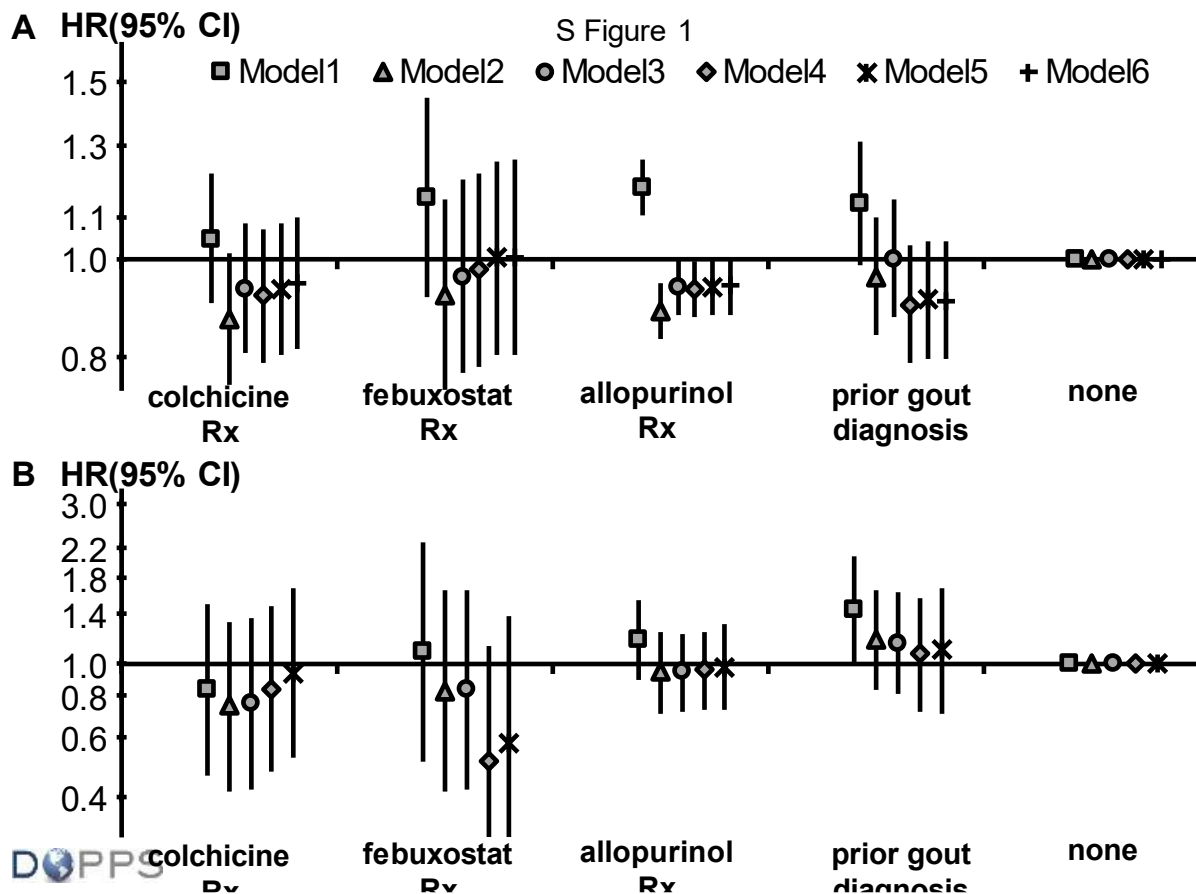

Note: Mutually exclusive categories were defined hierarchically as (1) colchicine Rx alone; (2) febuxostat Rx with no colchicine Rx; (3) allopurinol Rx with no colchicine or febuxostat Rx; (4)

prior diagnosis of gout with no colchicine, febuxostat, or allopurinol Rx; and (5) none of the above. Cox models were stratified by study phase and EHR data source, and fitted with progressive covariate adjustments: Model 1: unadjusted; Model 2: age only; Model 3: Model 2 + other demographics, including sex, Black race, BMI, and dialysis vintage; Model 4: Model 3 + 13 comorbidities; Model 5: Model 4 adjustments + albumin, creatinine, and phosphorus; Model 6 (HD only): Model 5 adjustments + vascular access type.
